# Supplementary material for: Alternative pathways to α,β-unsaturated ketones via direct oxidative coupling transformation using Sr-doped LaCoO3 perovskite catalyst
Source: R Soc Open Sci. 2019 Nov 27;6(11):191313. doi: 10.1098/rsos.191313 (PMC6894578; doi:10.1098/rsos.191313)
Supplement: Supporting information [file rsos191313supp1.doc]

**Alternative pathways to ,-unsaturated ketones** **via direct oxidative coupling transformation using Sr-doped LaCoO3 perovskite catalyst**

Khang H. Trinh, Son H. Doan, Tien V. Huynh, Phuong H. Tran, Diep T. N. Pham, Minh-Vien Le, Tung T. Nguyen*, Nam T. S. Phan*

Faculty of Chemical Engineering, HCMC University of Technology, VNU-HCM,

268 Ly Thuong Kiet, District 10, Ho Chi Minh City, Viet Nam

*Email: [tungtn@hcmut.edu.vn](mailto:tungtn@hcmut.edu.vn); [ptsnam@hcmut.edu.vn](mailto:ptsnam@hcmut.edu.vn)

Ph: (+84 8) 38647256 ext. 5681 Fx: (+84 8) 38637504

**Supporting information**

*Materials and instrumentation*

All reagents and starting materials were obtained commercially from Sigma-Aldrich and Merck, and were used as received without any further purification unless otherwise noted. Nitrogen physisorption measurements were conducted using a Micromeritics 2020 volumetric adsorption analyzer system. Samples were pretreated by heating under vacuum at 150 oC for 3 h. X-ray powder diffraction (XRD) patterns were recorded using a Cu Kα radiation source on a D8 Advance Bruker powder diffractometer. Scanning electron microscopy studies were conducted on a JSM-6500F, JEOL Scanning Electron Microscope (SEM).

Gas chromatographic (GC) analyses were performed using a Shimadzu GC 2010-Plus equipped with a flame ionization detector (FID) and an SPB-5 column (length = 30 m, inner diameter = 0.25 mm, and film thickness = 0.25 μm). The temperature program for GC analysis held samples at 100 oC for 1 min; heated them from 100 to 280 oC at 40 oC/min; held them at 280 oC for 4.5 min. Inlet and detector temperatures were set constant at 280 oC. The GC yield was calculated using diphenyl ether as the internal standard.

GC-MS analyses were analyzed on a Shimadzu GCMS-QP2010Ultra with a ZB-5MS column (length = 30 m, inner diameter = 0.25 mm, and film thickness = 0.25 μm). The temperature program for GC-MS analysis held samples at 50 oC for 2 min; heated samples from 50 to 280oC at 10 oC/min and held them at 280 oC for 10 min. Inlet temperature was set constant at 280 oC. MS spectra were compared with the spectra gathered in the NIST library. The 1H NMR and 13C NMR were recorded on Bruker AV 500 spectrometers using residual solvent peak as a reference.

Table S1. Screening of reaction conditionsa.

| Entry | Temperature (oC) | Oxidant | Oxidant amount (equiv.) | Catalyst amount (mol%) | Solvent | Yieldb (%) |
| --- | --- | --- | --- | --- | --- | --- |
| 1 | RT | DTBP | 4 | 5 | None | 0 |
| 2 | 80 | DTBP | 4 | 5 | None | 5 |
| 3 | 100 | DTBP | 4 | 5 | None | 43 |
| 4 | 120 | DTBP | 4 | 5 | None | 80 |
| 5 | 140 | DTBP | 4 | 5 | None | 5 |
|  | | | | | | |
| 6 | 120 | None | 4 | 5 | None | 7 |
| 7 | 120 | K2S2O8 | 4 | 5 | None | 60 |
| 8 | 120 | AgNO3 | 4 | 5 | None | 12 |
| 9 | 120 | Oxygen | 4 | 5 | None | 9 |
| 10 | 120 | H2O2 | 4 | 5 | None | 4 |
| 11 | 120 | TBHP/water | 4 | 5 | None | 20 |
| 12 | 120 | TBHP/decane | 4 | 5 | None | 10 |
| 13 | 120 | TBPB | 4 | 5 | None | 64 |
| 14 | 120 | CHP | 4 | 5 | None | 22 |
| 15 | 120 | DTBP | 4 | 5 | None | 80 |
|  | | | | | | |
| 16 | 120 | DTBP | 0 | 5 | None | 5 |
| 17 | 120 | DTBP | 1 | 5 | None | 38 |
| 18 | 120 | DTBP | 2 | 5 | None | 45 |
| 19 | 120 | DTBP | 3 | 5 | None | 58 |
| 20 | 120 | DTBP | 4 | 5 | None | 80 |
|  | | | | | | |
| 21 | 120 | DTBP | 4 | 0 | None | 0 |
| 22 | 120 | DTBP | 4 | 1 | None | 17 |
| 23 | 120 | DTBP | 4 | 3 | None | 55 |
| 24 | 120 | DTBP | 4 | 5 | None | 80 |
| 25 | 120 | DTBP | 4 | 7 | None | 80 |
|  | | | | | | |
| 26 | 120 | DTBP | 4 | 5 | PhCl | 6 |
| 27 | 120 | DTBP | 4 | 5 | NMP | 1 |
| 28 | 120 | DTBP | 4 | 5 | DCB | 7 |
| 29 | 120 | DTBP | 4 | 5 | DMSO | 1 |
| 30 | 120 | DTBP | 4 | 5 | THF | 5 |
| 31 | 120 | DTBP | 4 | 5 | Dioxane | 18 |
| 32 | 120 | DTBP | 4 | 5 | DMF | 1 |
| 33 | 120 | DTBP | 4 | 5 | DMAc | 1 |
| 34 | 120 | DTBP | 4 | 5 | None | 80 |

aReaction conditions: 1,1-diphenylethylene (0.3 mmol); benzaldehyde (1 mL); 18 h; under air. bGC yield. DTBP: di-*tert*-butylperoxide; TBHP/water: *tert*-butyl hydroperoxide in water; TBHP/decade: *tert*-butyl hydroperoxide in decane; TBPB: *tert*-butyl peroxybenzoate; CHP: cumyl hydroperoxide; PhCl: chlorobenzene; NMP: *N*-methyl-2-pyrrolidone; DCB: *o*-dichlorobenzene; DMSO: dimethylsulfoxide, THF: tetrahydrofuran; DMF: dimethylformamide; DMAc: *N*,*N*-dimethylacetamide.

Table S2. The direct oxidative coupling of benzaldehyde with 1,1-diphenylethylene using different catalystsa.

| Entry | Homogeneous catalyst | Heterogeneous catalyst | Yieldb (%) |
| --- | --- | --- | --- |
| 1 | FeCl2 |  | 38 |
| 2 | FeCl3 | 43 |
| 3 | Fe(NO3)3 | 1 |
| 4 | FeSO4 | 1 |
| 5 | CuSO4 | 17 |
| 6 | Cu(NO3)2 | 24 |
| 7 | Ni(NO3)2 | 11 |
| 8 | La(NO3)2 | 1 |
| 9 | Co(NO3)2 | 24 |
| 10 | Sr(NO3)2 | 1 |
| 11 |  | Cu-MOF-74 | 27 |
| 12 | Cu2(BDC)2(DABCO) | 29 |
| 13 | Cu(BDC) | 35 |
| 14 | Fe3(BTC)2(NDC) | 1 |
| 15 | UiO-66.TFA | 1 |
| 16 | La2O3 | 16 |
| 17 | CoO | 28 |
| 18 | SrO | 1 |
| 19 | LaCoO3 | 41 |
| 20 | La0.6Sr0.4CoO3 | 80 |

aReaction conditions: 1,1-diphenylethylene (0.3 mmol); benzaldehyde (1 mL); DTBP (1.2 mmol); catalyst (5 mol%); 120 oC; 18 h; under air. bGC yield.


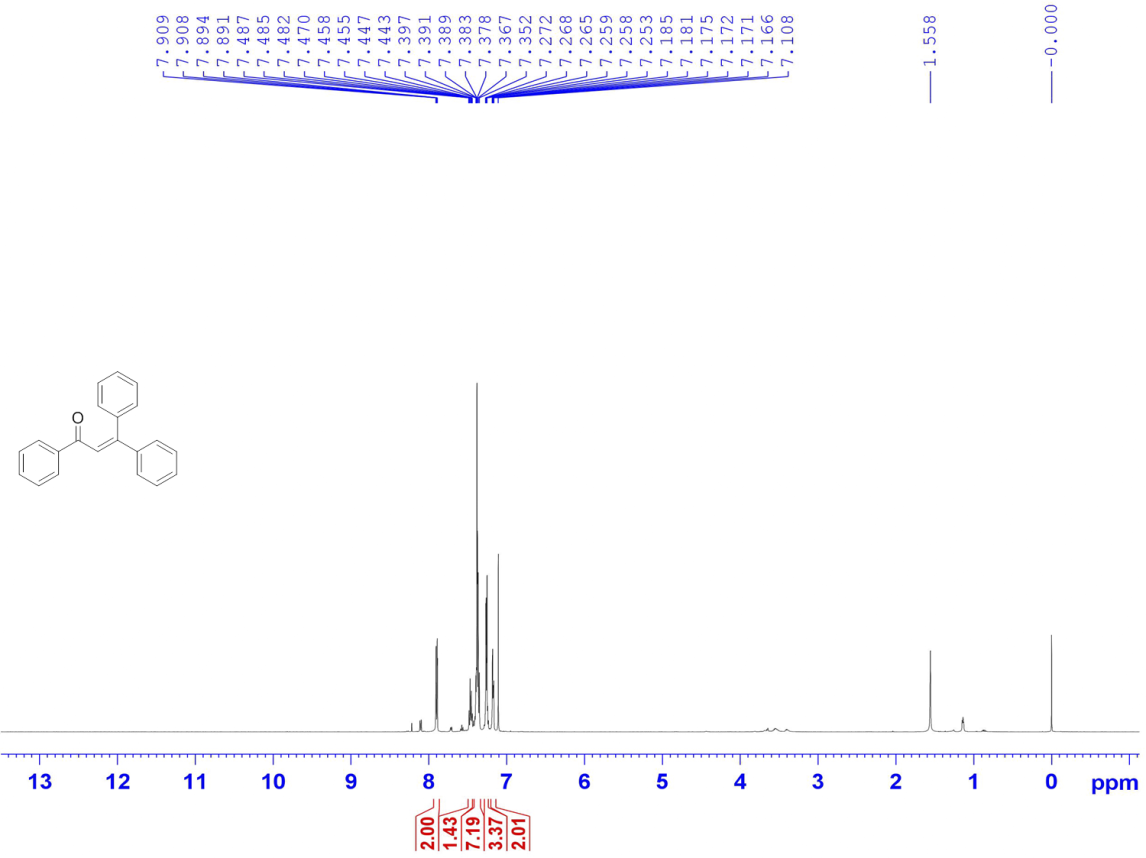


Fig.S3. 1H-NMR spectra of 1,3,3-triphenylprop-2-en-1-one.


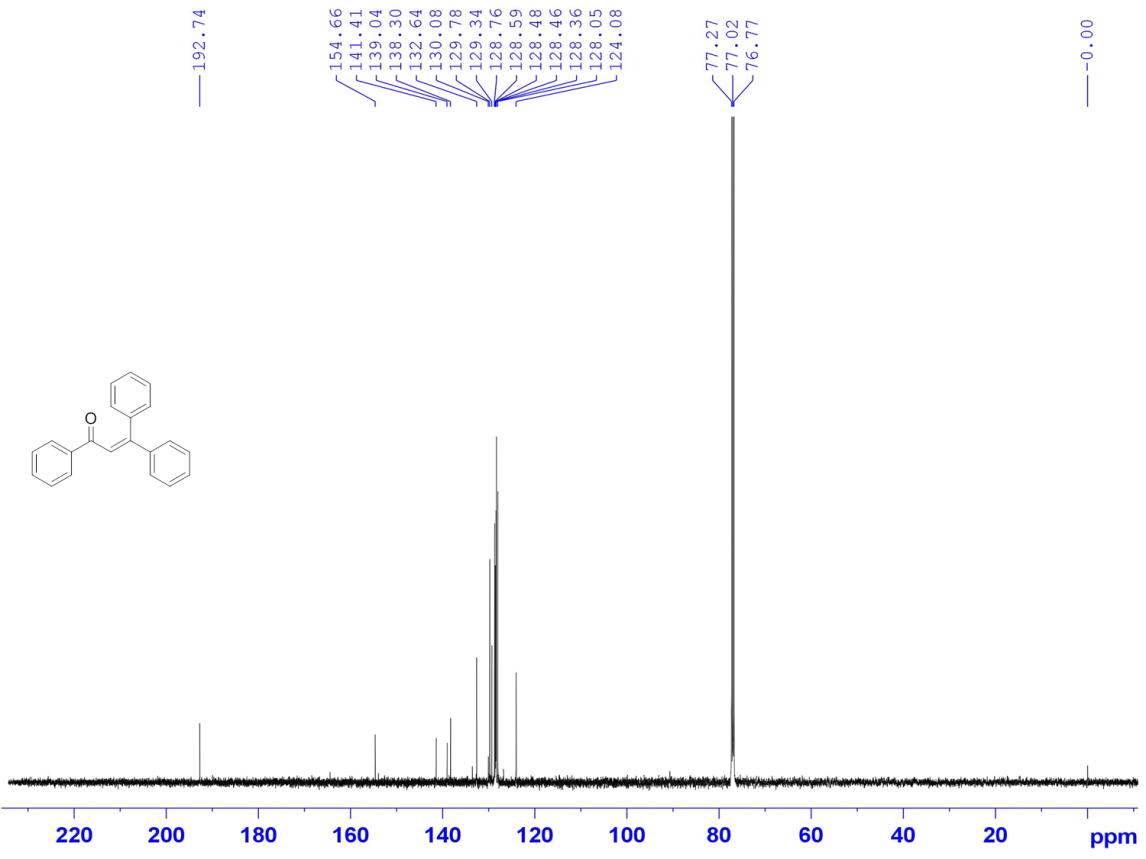


Fig.S4. 13C-NMR spectra of 1,3,3-triphenylprop-2-en-1-one.

**Characterization data for 1,3,3-triphenylprop-2-en-1-one**

Prepared as shown in the general experimental procedure and purified on silica gel (230-400 mesh or 37-63 mm, ethyl acetate/hexane = 1:15 (v./v.), TLC silica gel 60 F254, Rf = 0.4): Light yellow liquid, 75% yield (64 mg). 1H-NMR (500 MHz, CDCl3) 7.10 (s, 1H), 7.16-7.18 (m, 2H), 7.25-7.27 (m, 3H), 7.35-7.39 (m, 7H), 7.44-7.48 (m, 1H), 7.89 (dd, *J* = 8.0 Hz, 1.0 Hz, 2H). 13C NMR (CDCl3, 125 MHz) δ(ppm) 124.0, 128.0, 128.3, 128.4, 128.4, 128.5, 128.7, 129.3, 129.7, 130.0, 132.6, 138.3, 139.0, 141.4, 154.6, 192.7.


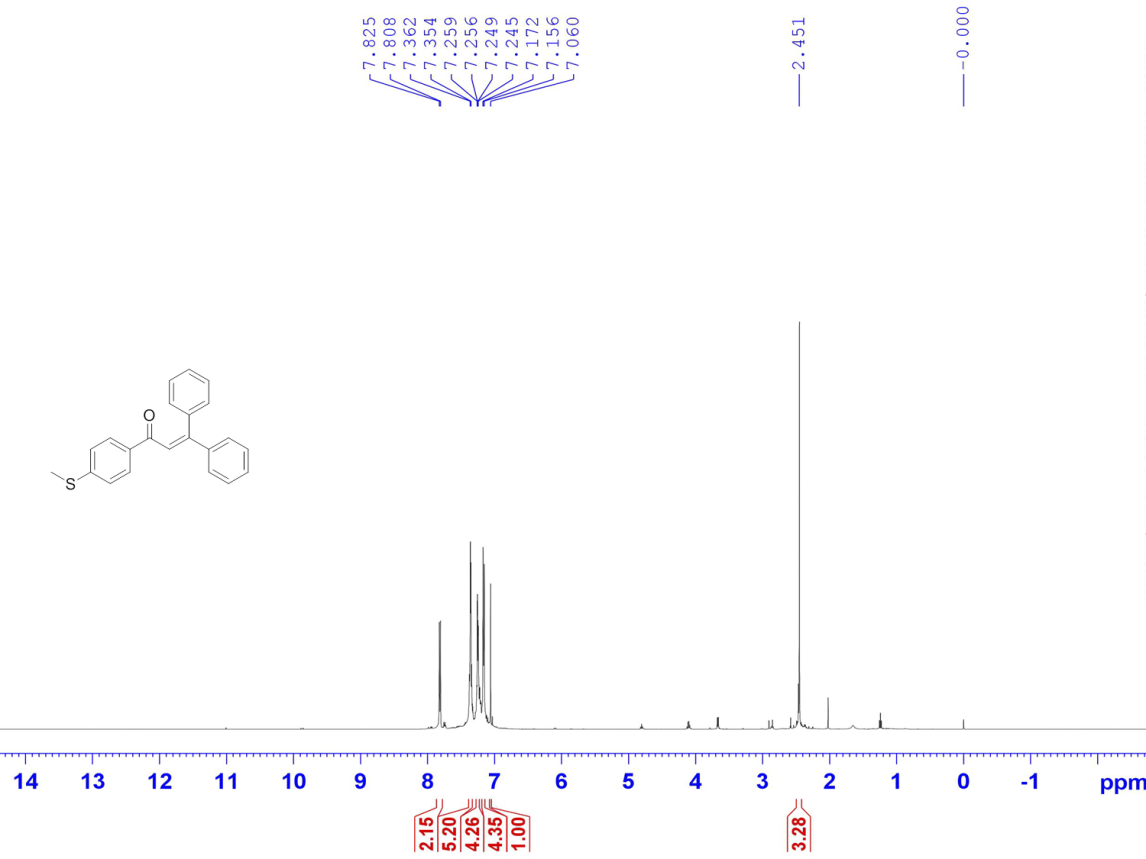


Fig.S5. 1H-NMR spectrum of 1-(4-(methylthio)phenyl)-3,3-diphenylprop-2-en-1-one.


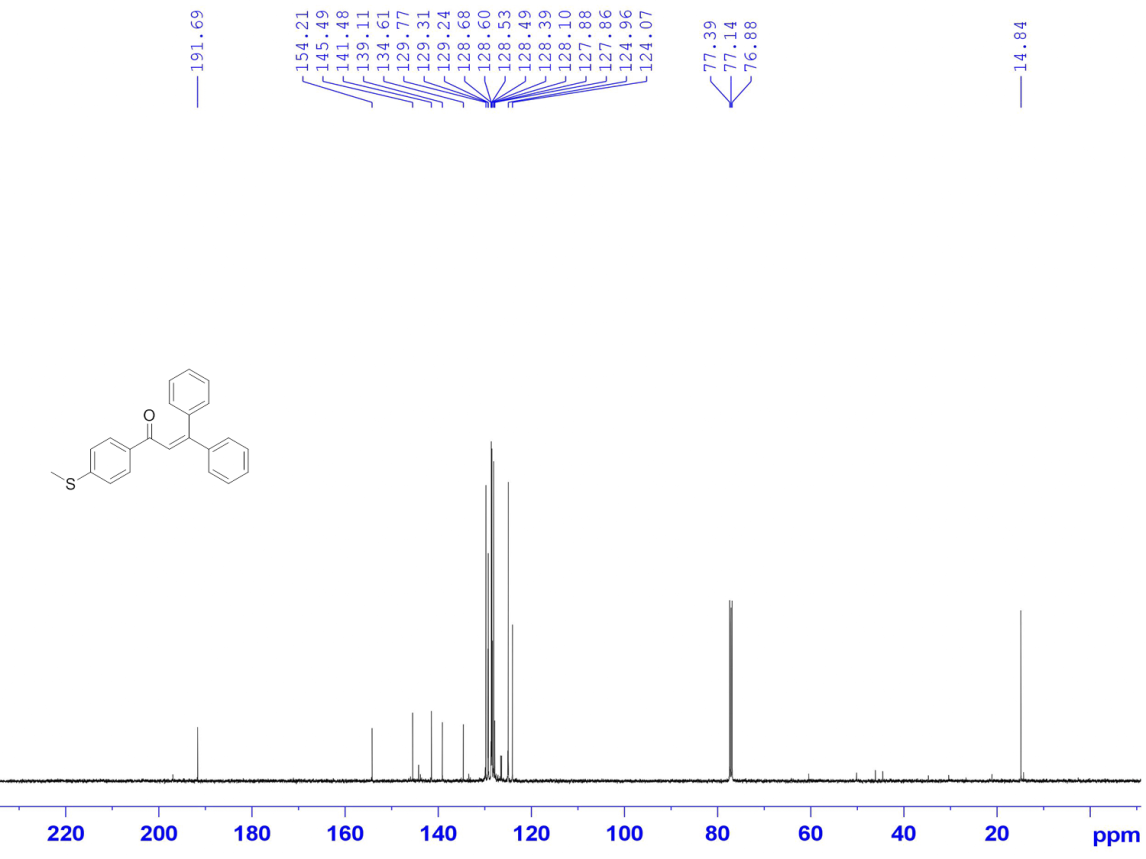


Fig.S6. 13C-NMR spectrum of 1-(4-(methylthio)phenyl)-3,3-diphenylprop-2-en-1-one.

**Characterization data for 1-(4-(methylthio)phenyl)-3,3-diphenylprop-2-en-1-one.**

Prepared as shown in the general experimental procedure and purified on silica gel (230-400 mesh or 37-63 m, ethyl acetate/hexane = 1:20 (v./v.), TLC silica gel 60 F254, Rf = 0.4):Yellow liquid, 76% yield (76 mg).1H-NMR (500 MHz, CDCl3) 2.45 (s, 3H), 7.06 (s, 1H), 7.15 (d, *J* = 8.0 Hz, 4H), 7.24-7.25 (m, 4H), 7.35-7.36 (m, 5H), 7.80 (d, *J* = 8.5 Hz, 2H). 13C NMR (CDCl3, 125 MHz) δ(ppm) 14.8, 124.0, 124.9, 127.8, 127.8, 128.1, 128.3, 128.4, 128.5, 128.6, 128.6, 129.2, 129.3, 129.7, 134.6, 139.1, 141.4, 145.4, 154.2, 191.6.


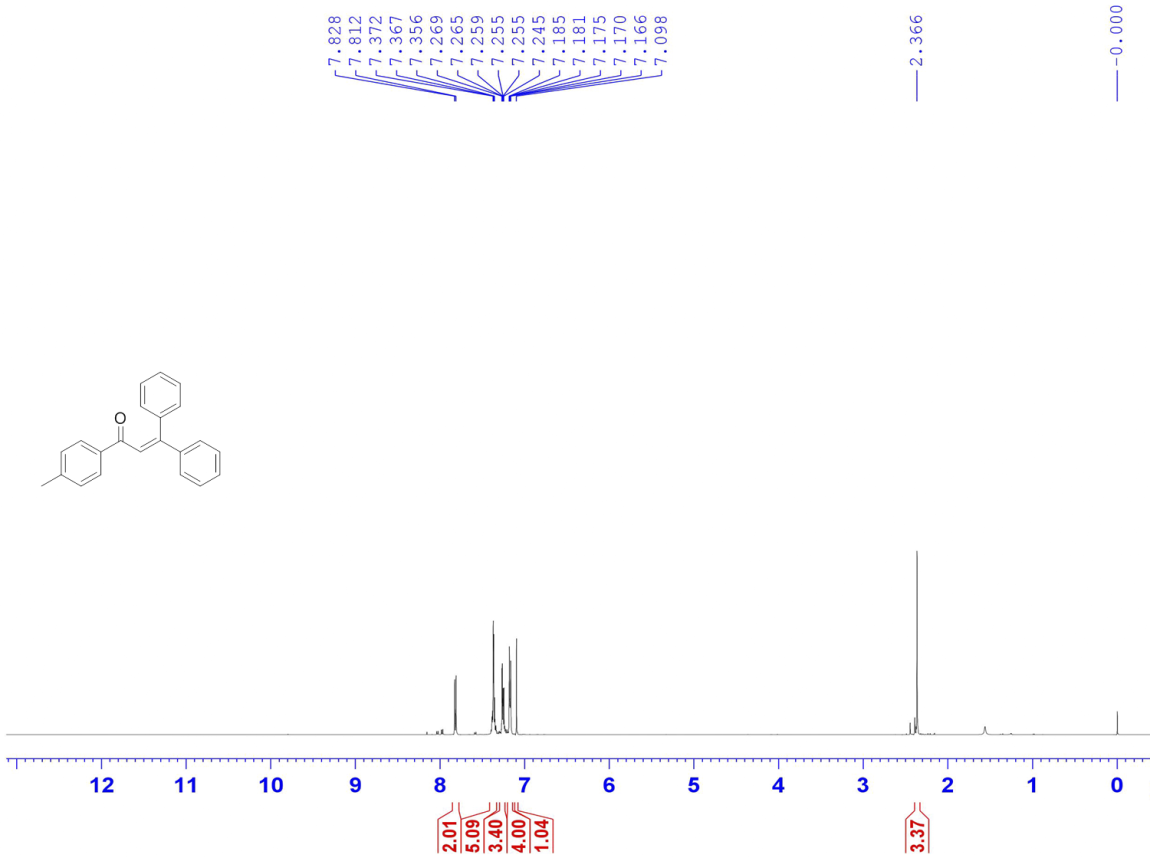


Fig.S7. 1H-NMR spectra of 3,3-diphenyl-1-p-tolylprop-2-en-1-one.


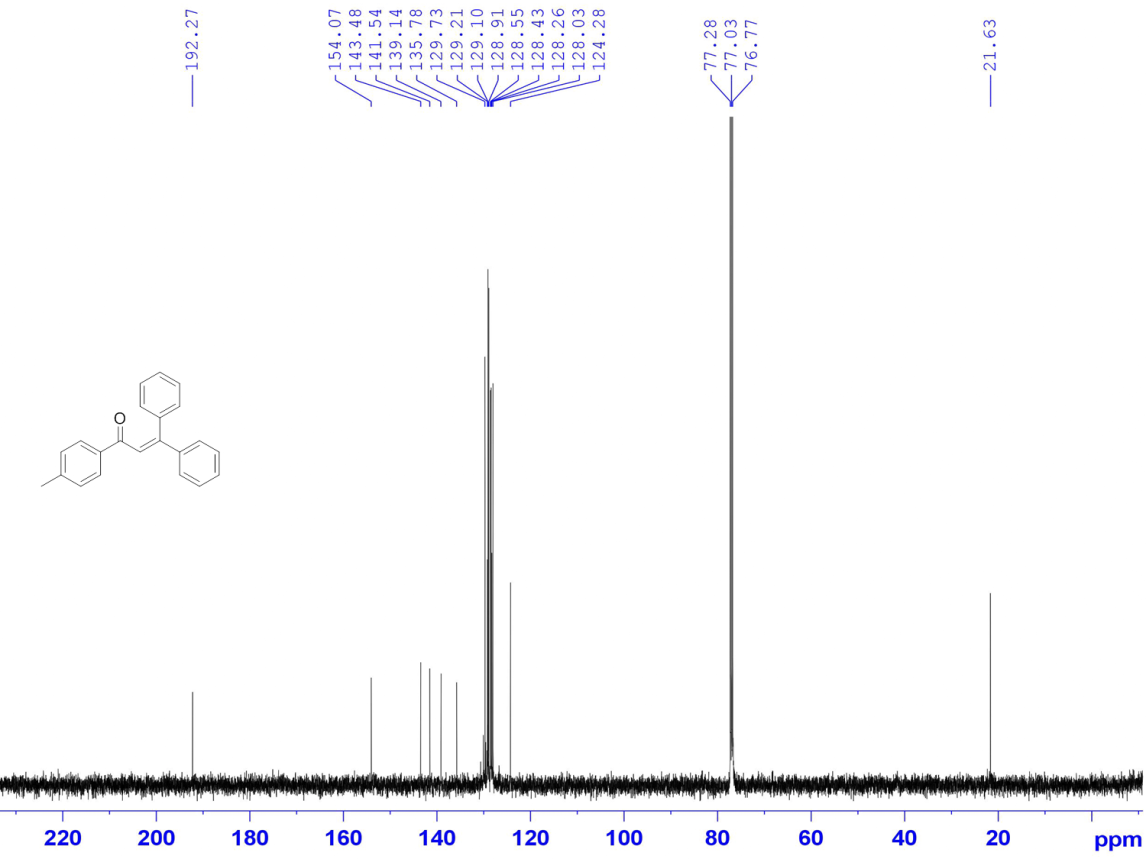


Fig.S8 13C-NMR spectra of 3,3-diphenyl-1-p-tolylprop-2-en-1-one.

**Characterization data for 3,3-diphenyl-1-p-tolylprop-2-en-1-one**

Prepared as shown in the general experimental procedure and purified on silica gel (230-400 mesh or 37-63 m, ethyl acetate/hexane = 1:15 (v./v.), TLC silica gel 60 F254, Rf = 0.3): Yellow liquid, 76% yield (68 mg). 1H-NMR (500 MHz, CDCl3) 2.36 (s, 3H), 7.09 (s, 1H), 7.16-7.18 (m, 4H), 7.24-7.26 (m, 3H), 7.35-7.38 (m, 5H), 7.81 (d, *J* = 8.0 Hz, 2H). 13C NMR (CDCl3, 125 MHz) δ(ppm) 21.6, 124.2, 128.0, 128.2, 128.4, 128.5, 128.9, 129.1, 129.2, 129.7, 135.7, 139.1, 141.5, 143.4, 154.0, 192.2.


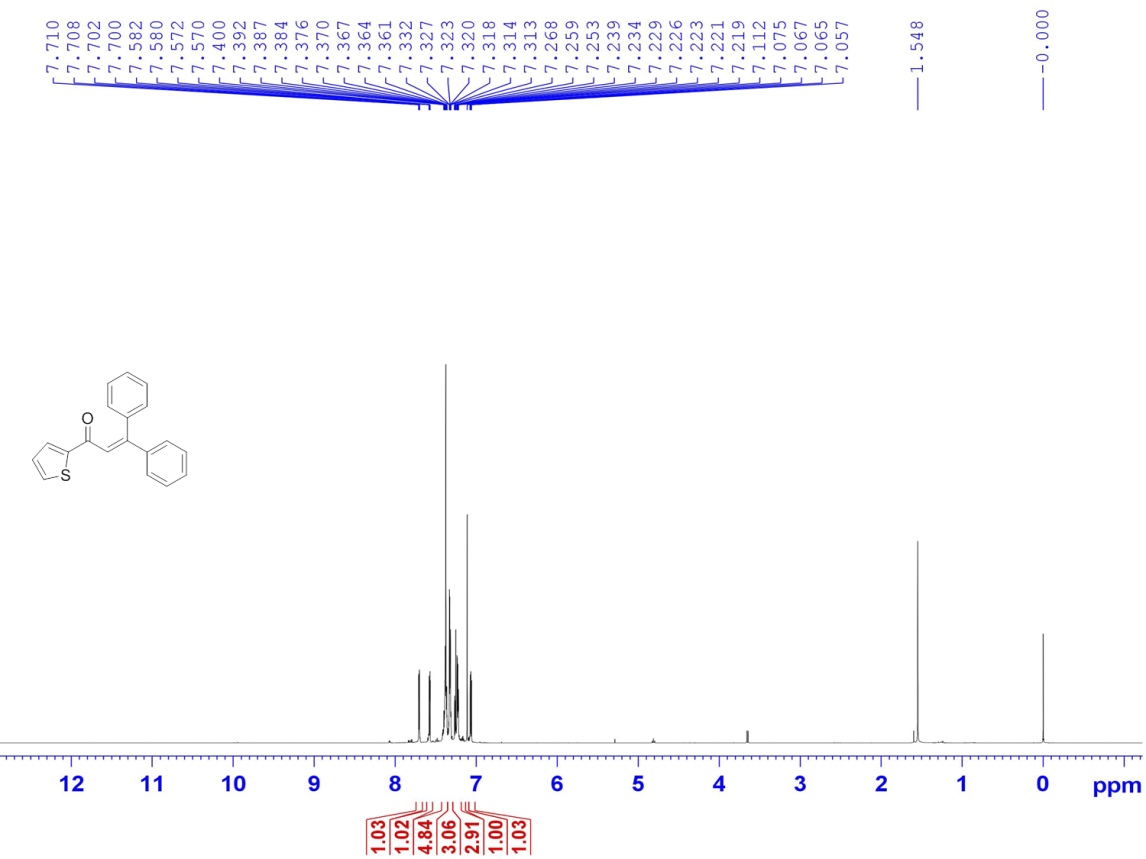


Fig.S9. 1H-NMR spectrum of 3,3-diphenyl-1-(thiophen-2-yl)prop-2-en-1-one.


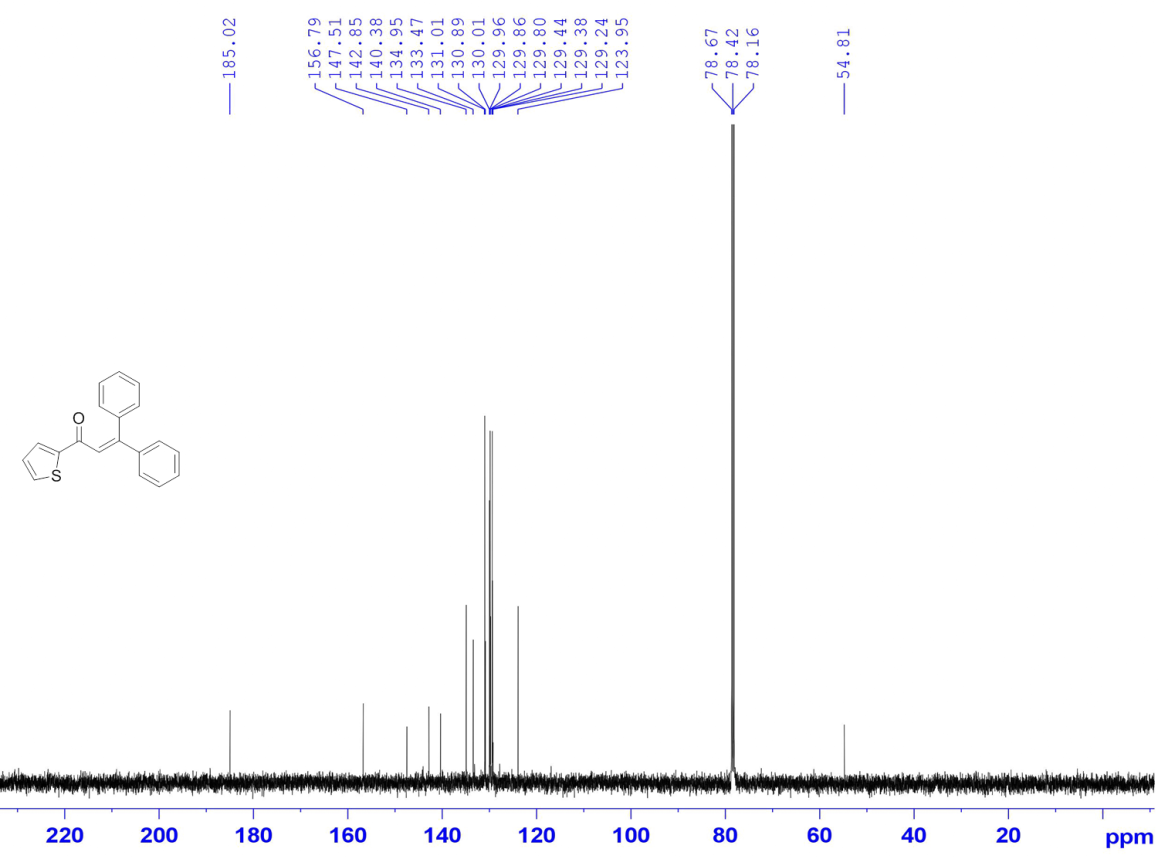


Fig.S10. 13C-NMR spectrum of 3,3-diphenyl-1-(thiophen-2-yl)prop-2-en-1-one.

**Characterization data for 3,3-diphenyl-1-(thiophen-2-yl)prop-2-en-1-one**

Prepared as shown in the general experimental procedure and purified on silica gel (230-400 mesh or 37-63 m, ethyl acetate/hexane = 1:10 (v./v.), TLC silica gel 60 F254, Rf = 0.45): Yellow liquid, 71% yield (62 mg). 1H-NMR (500 MHz, CDCl3) 7.05-7.07 (m, 1H), 7.11 (s, 1H), 7.21-7.26 (m, 2H), 7.31-7.33 (m, 3H), 7.36-7.40 (m, 5H), 7.57 (dd, *J* = 5.0 Hz, 1 Hz, 1H), 7.70 (dd, *J* = 4.0 Hz, 1 Hz, 1H). 13C NMR (CDCl3, 125 MHz) δ(ppm) 123.9, 129.2, 129.3, 129.4, 129.8, 129.8, 129.9, 130.0, 130.8, 131.0, 133.4, 134.9, 140.3, 142.8, 147.5, 156.7, 185.0.


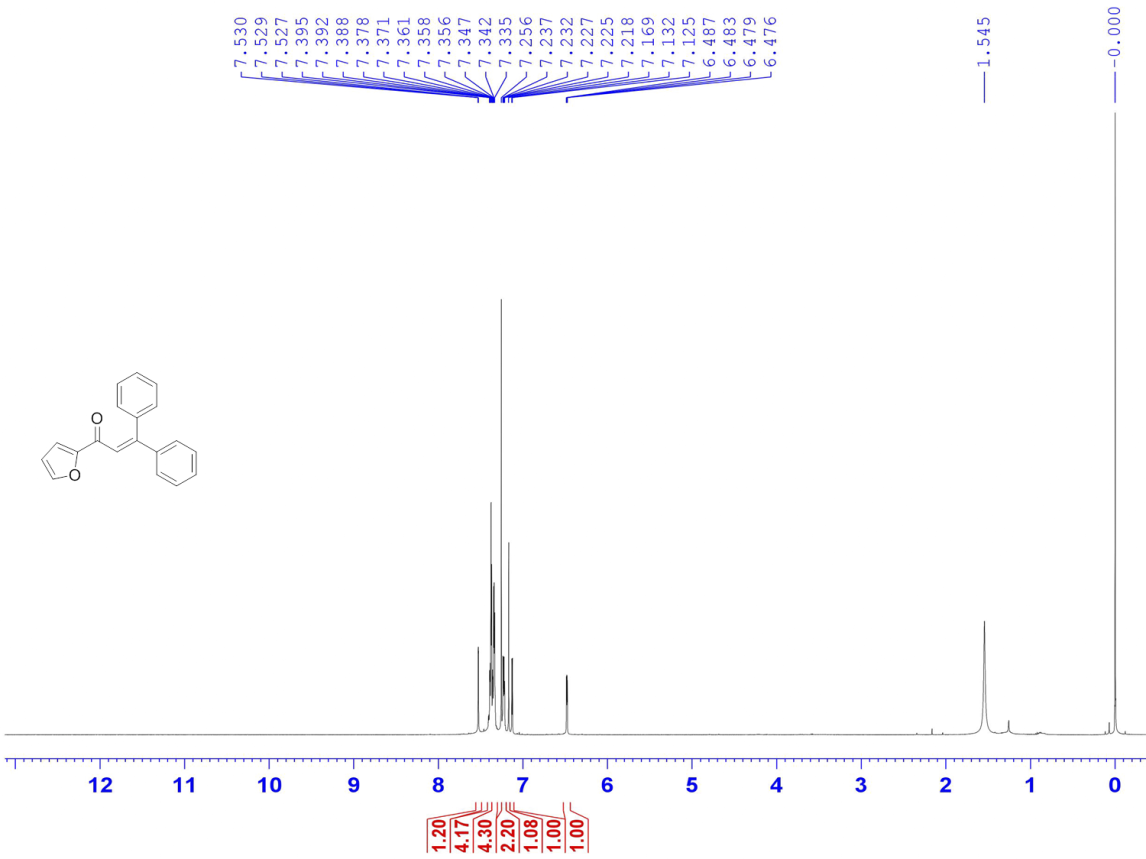


Fig.S11. 1H-NMR spectrum of 1-(furan-2-yl)-3,3-diphenylprop-2-en-1-one.


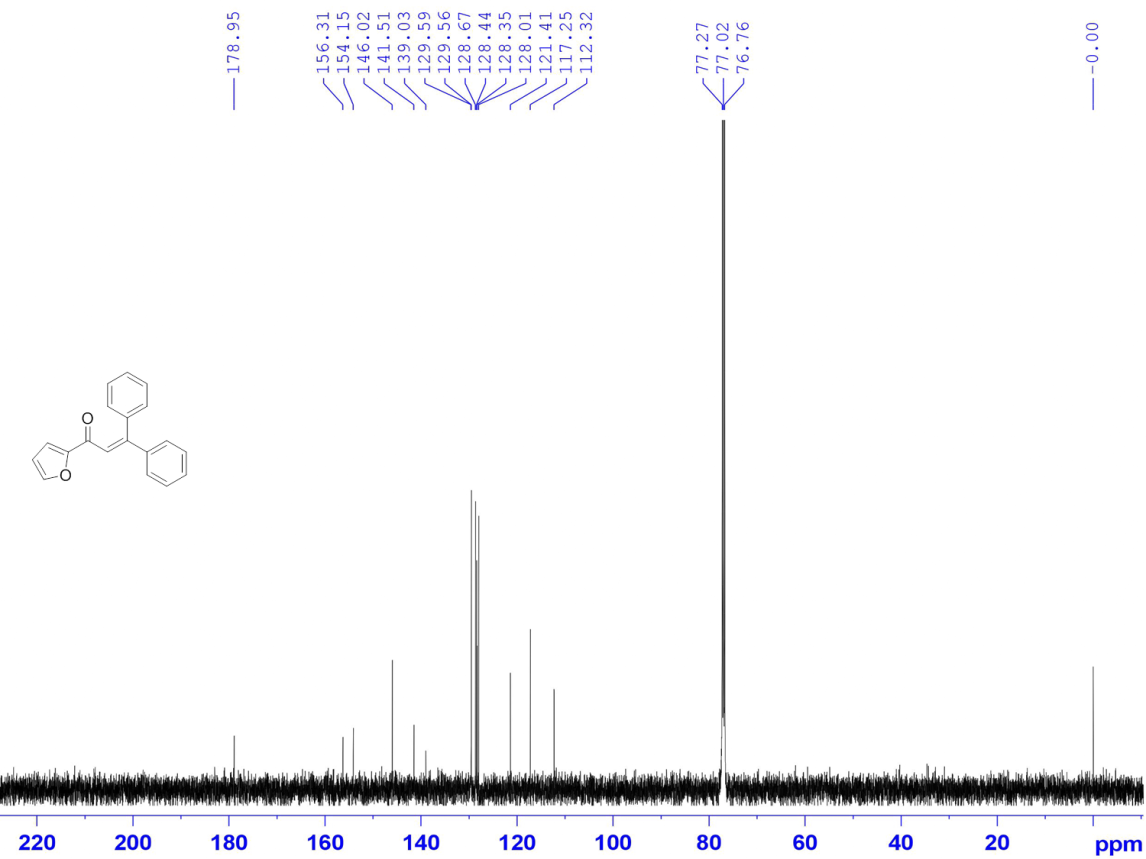


Fig.S12. 13C-NMR spectrum of 1-(furan-2-yl)-3,3-diphenylprop-2-en-1-one.

**Characterization data for 1-(furan-2-yl)-3,3-diphenylprop-2-en-1-one**

Prepared as shown in the general experimental procedure and purified on silica gel (230-400 mesh or 37-63 m, ethyl acetate/hexane = 1:10 (v./v.), TLC silica gel 60 F254, Rf = 0.4): Yellow liquid, 73% yield (60 mg). 1H-NMR (500 MHz, CDCl3) 6.47-6.48 (m, 1H), 7.12 (d, *J* = 3.5 Hz, 1H), 7.16 (s, 1H), 7.21-7.23 (m, 2H), 7.33-7.35 (m, 4H), 7.35-7.39 (m, 4H), 7.52-7.53 (m, 1H). 13C NMR (CDCl3, 125 MHz) δ(ppm) 112.3, 117.2, 121.4, 128.0, 128.3, 128.4, 128.6, 129.5, 129.5, 139.0, 141.5, 146.0, 154.1, 156.3, 178.9.


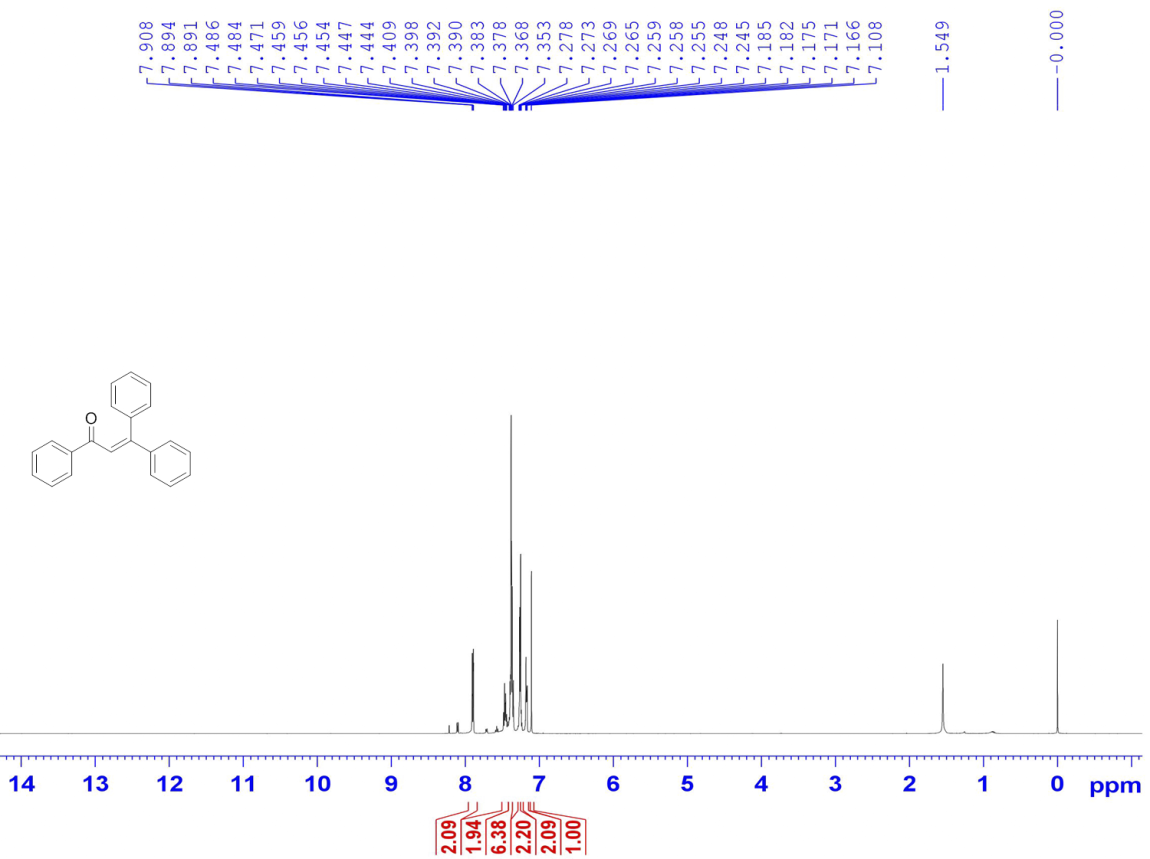


Fig.S13. 1H-NMR spectra of 1,3,3-triphenylprop-2-en-1-one.


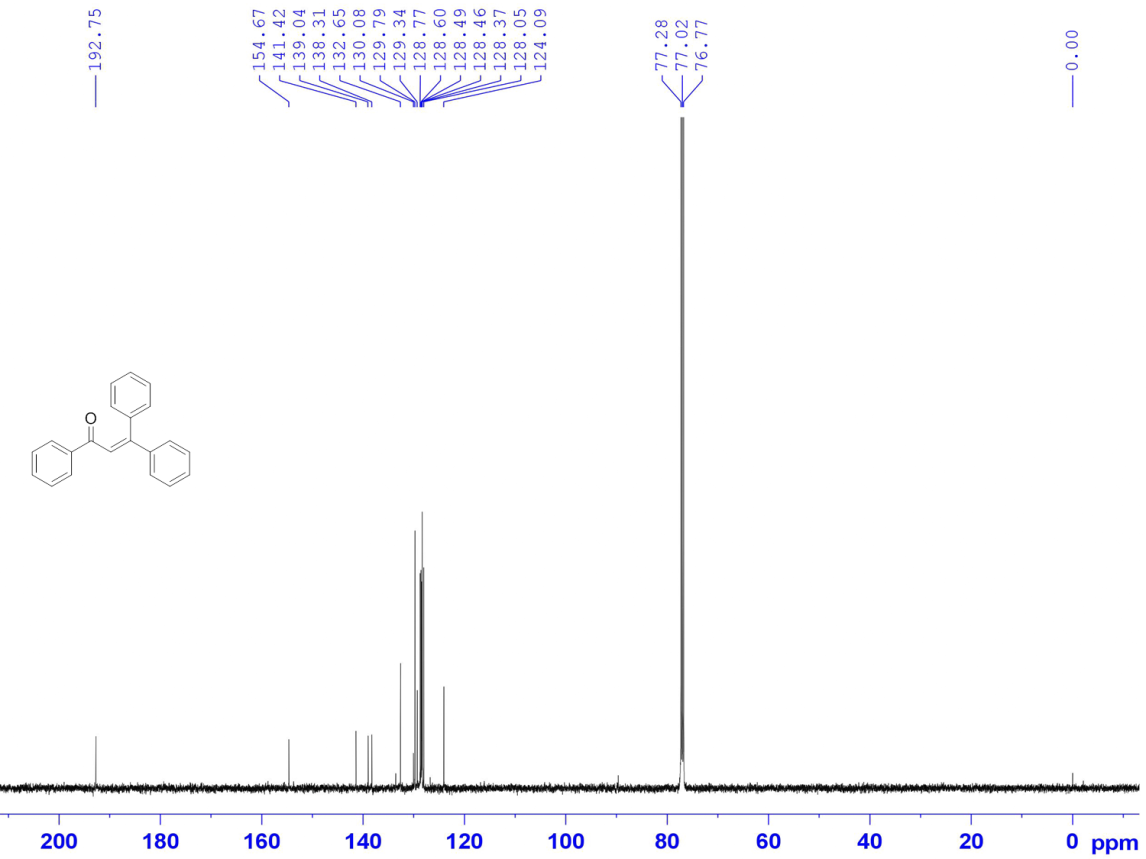


Fig.S14. 13C-NMR spectra of 1,3,3-triphenylprop-2-en-1-one.

**Characterization data for 1,3,3-triphenylprop-2-en-1-one**

Prepared as shown in the general experimental procedure and purified on silica gel (230-400 mesh or 37-63 m, ethyl acetate/hexane = 1:15 (v./v.), TLC silica gel 60 F254, Rf = 0.4): Yellow liquid, 57% yield (48 mg). 1H-NMR (500 MHz, CDCl3) 7.10 (s, 1H), 7.16-7.18 (m, 2H), 7.24-7.27 (m, 2H), 7.35-7.40 (m, 7H), 7,44-7.48 (m, 2H), 7.89 (dd, *J* = 8.0 Hz, 1Hz, 2H). 13C NMR (CDCl3, 125 MHz) δ(ppm) 124.0, 128.0, 128.3, 128.4, 128.4, 128.6, 128.7, 129.3, 129.7, 130.0, 132.6, 138.3, 139.0, 141.4, 154.6, 192.7.


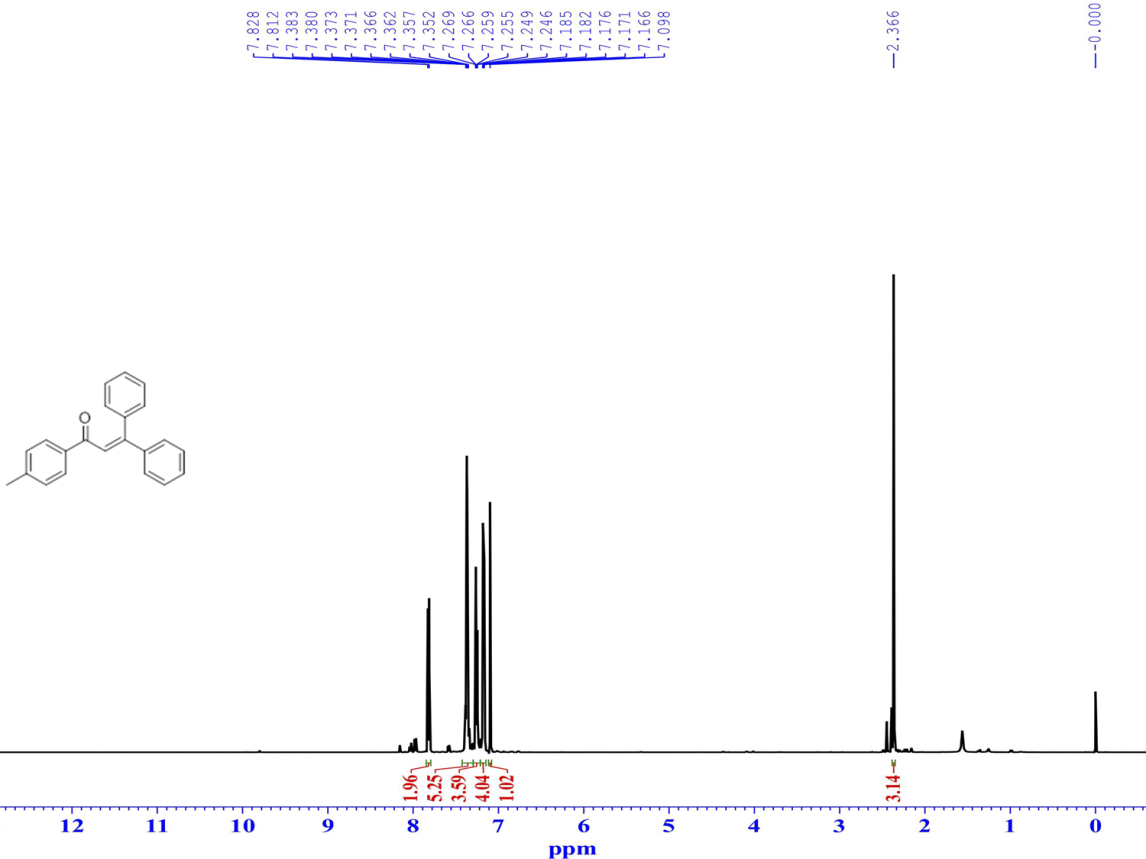


Fig.S15. 1H-NMR spectra of 3,3-diphenyl-1-p-tolylprop-2-en-1-one.


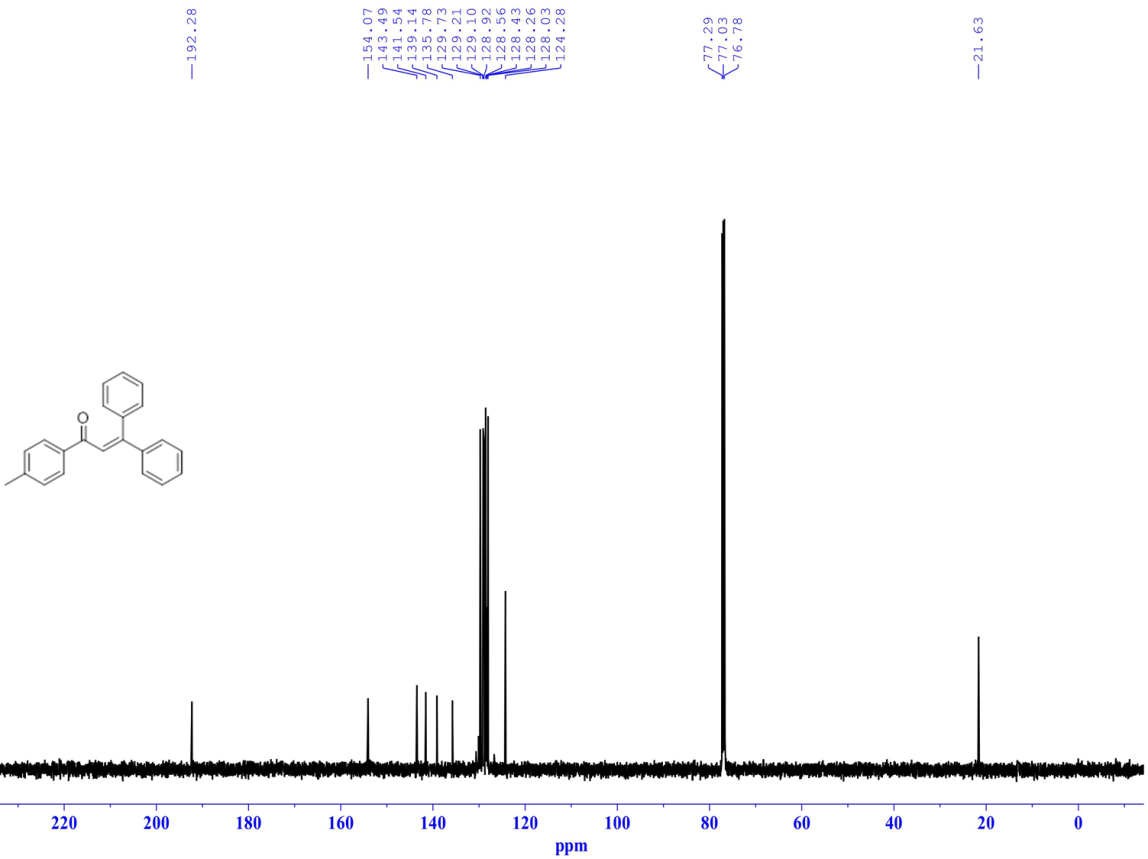


Fig.S16. 13C-NMR spectra of 3,3-diphenyl-1-p-tolylprop-2-en-1-one.

**Characterization data for 3,3-diphenyl-1-p-tolylprop-2-en-1-one**

Prepared as shown in the general experimental procedure and purified on silica gel (230-400 mesh or 37-63 m, ethyl acetate/hexane = 1:15 (v./v.), TLC silica gel 60 F254, Rf = 0.3): Yellow liquid, 53% yield (47 mg). 1H-NMR (500 MHz, CDCl3) 2.36 (s, 3H), 7.09 (s, 1H), 7.16-7.18 (m, 4H), 7.24-7.29 (m, 3H), 7.34-7.38 (m, 5H), 7.81-7.82 (d, *J* = 8.0 Hz, 2H). 13C NMR (CDCl3, 125 MHz) δ(ppm) 21.6, 124.2, 128.0, 128.2, 128.4, 128.5, 128.9, 129.1, 129.2, 129.7, 135.7, 139.1, 141.5, 143.4, 154.0, 192.2.


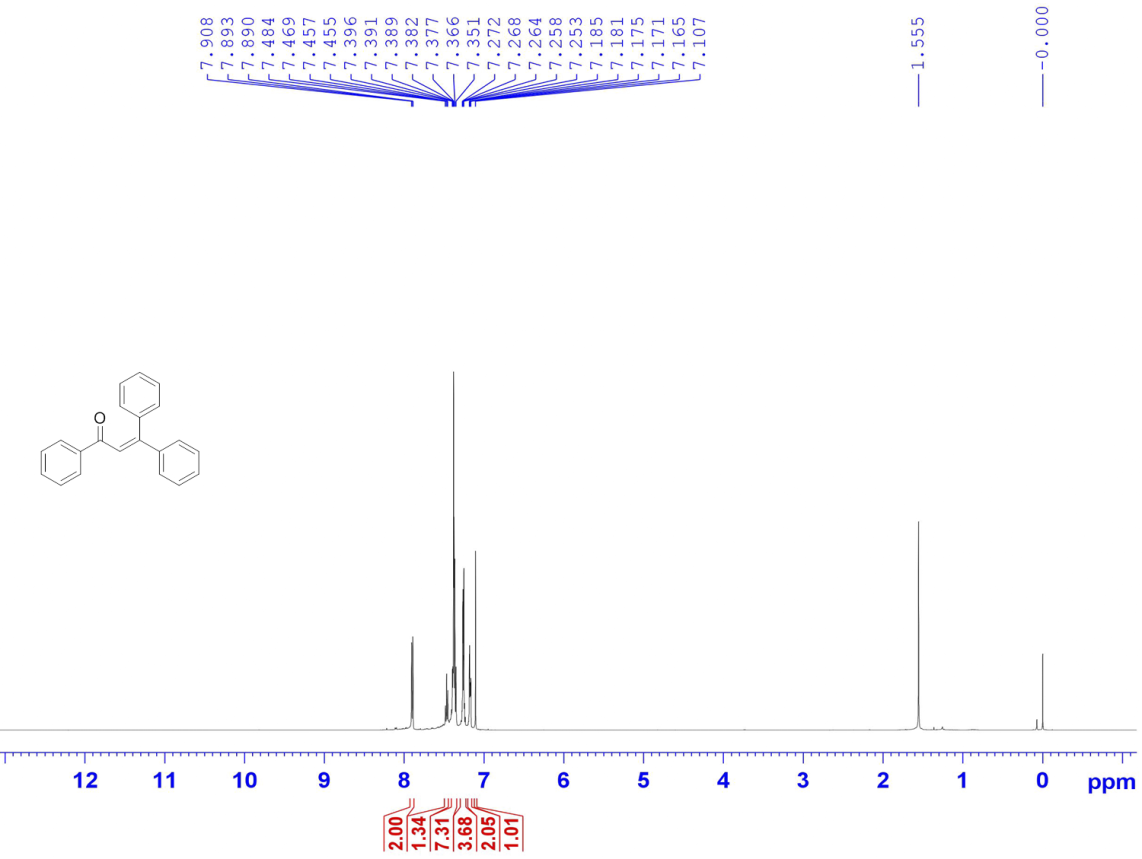


Fig.S17. 1H-NMR spectra of 1,3,3-triphenylprop-2-en-1-one.


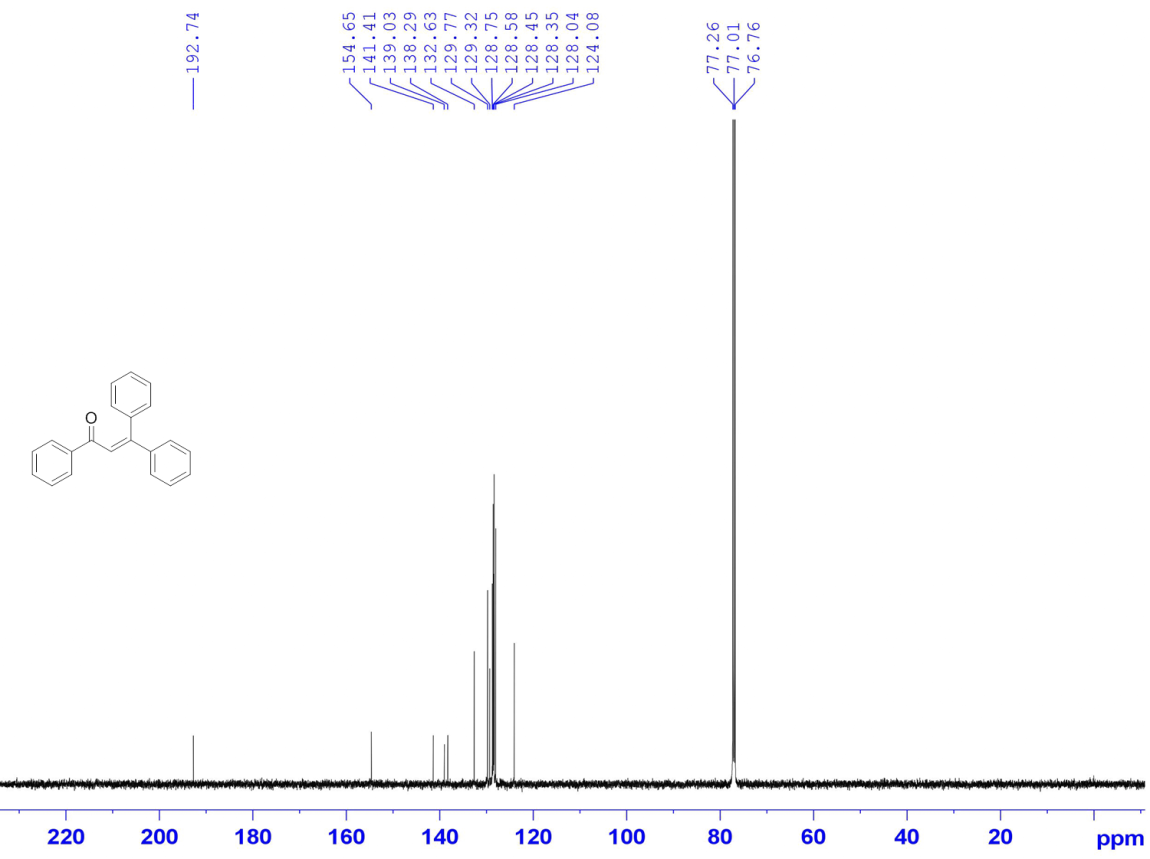


Fig.S18. 13C-NMR spectra of 1,3,3-triphenylprop-2-en-1-one.

**Characterization data for 1,3,3-triphenylprop-2-en-1-one**

Prepared as shown in the general experimental procedure and purified on silica gel (230-400 mesh or 37-63 m, ethyl acetate/hexane = 1:15 (v./v.), TLC silica gel 60 F254, Rf = 0.4): Yellow liquid, 51% yield (43 mg). 1H-NMR (500 MHz, CDCl3) 7.10 (s, 1H), 7.16-7.18, m, 2H), 7.25-7.27 (m, 3H), 7.35-7.39 (m, 7H), 7.45-7.48 (m, 1H), 7.89 (dd, *J* = 8.0 Hz, 1Hz 2H). 13C NMR (CDCl3, 125 MHz) δ(ppm) 124.0, 128.0, 128.3, 128.4, 128.5, 128.7, 129.3, 129.7, 132.6, 138.2, 139.0, 141.4, 154.6, 192.7.


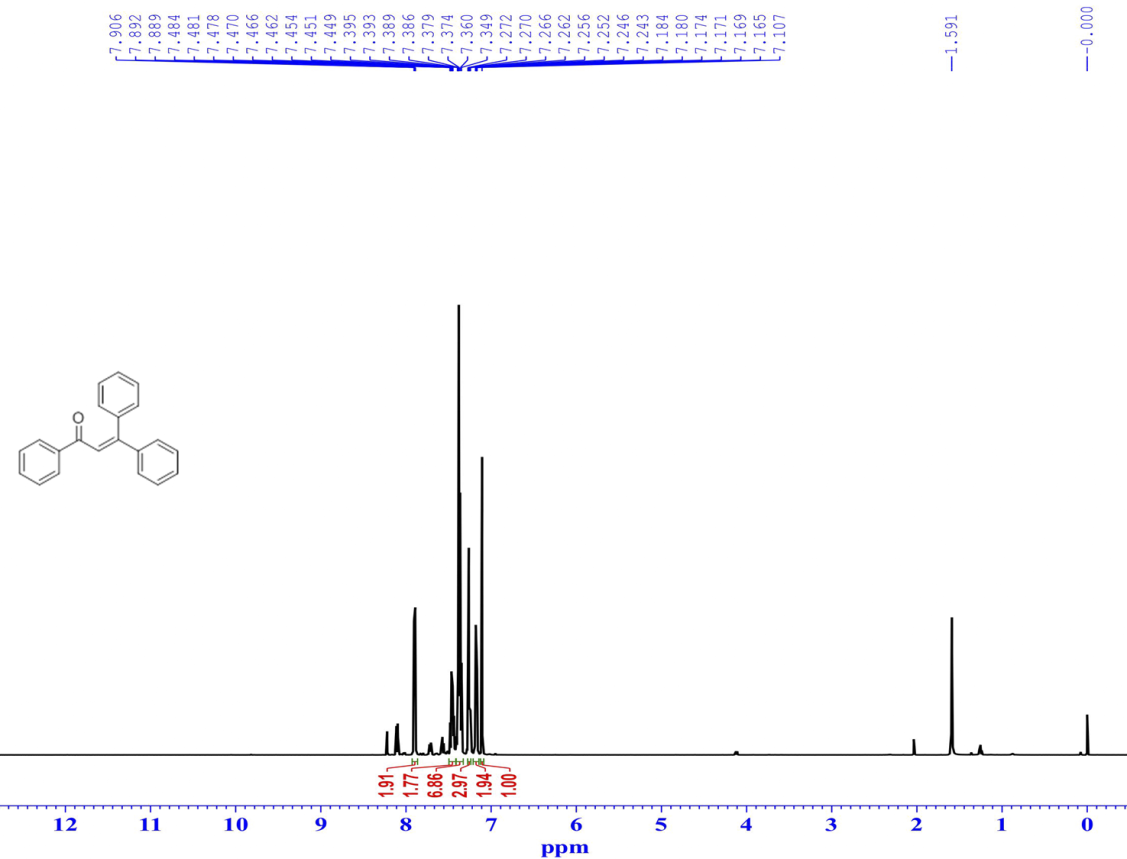


Fig.S19. 1H-NMR spectra of 1,3,3-triphenylprop-2-en-1-one.


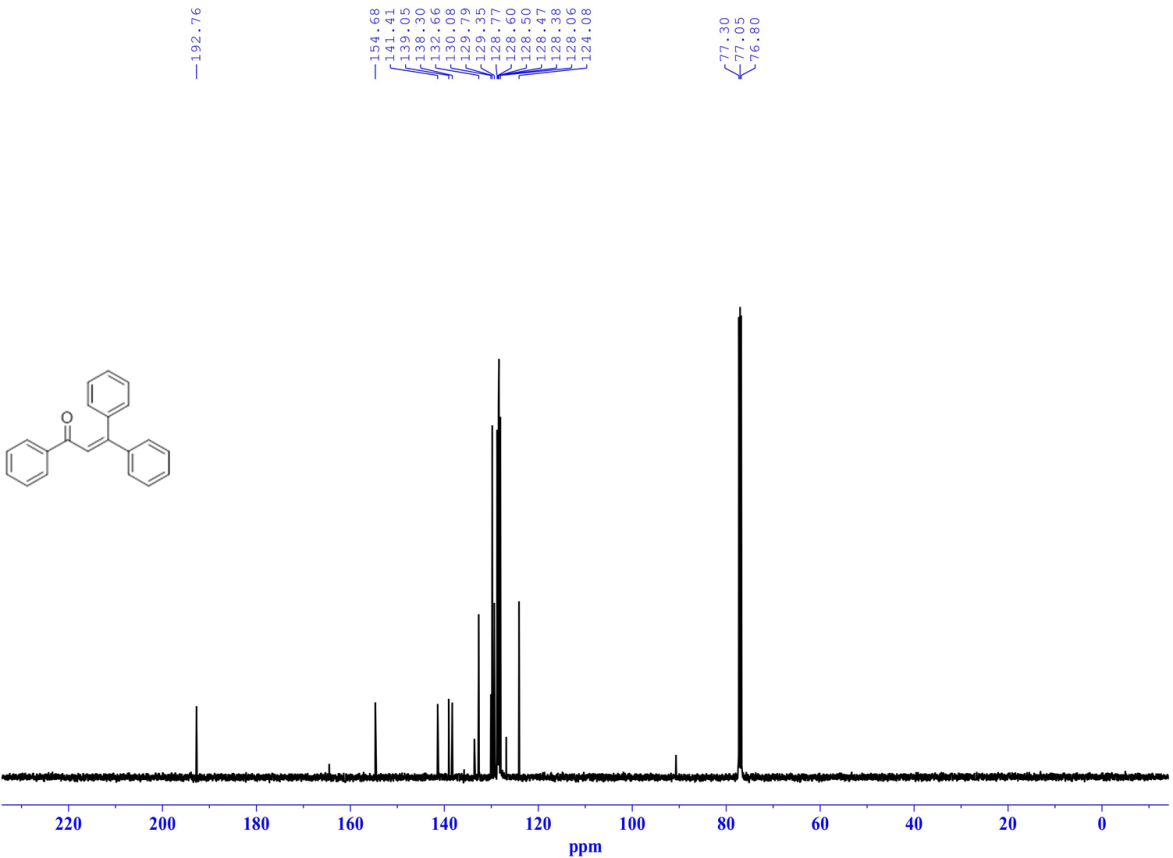


Fig.S20. 13C-NMR spectra of 1,3,3-triphenylprop-2-en-1-one.

**Characterization data for 1,3,3-triphenylprop-2-en-1-one**

Prepared as shown in the general experimental procedure and purified on silica gel (230-400 mesh or 37-63 m, ethyl acetate/hexane = 1:15 (v./v.), TLC silica gel 60 F254, Rf = 0.35): Light yellow liquid, 71% yield (60 mg). 1H-NMR (500 MHz, CDCl3) 7.10 (s, 1H), 7.16-7.18 (m, 2H), 7.24-7.27 (m, 3H), 7.34-7.39 (m, 7H), 7.44-7.48 (m, 1H), 7.89-7.90 (d, *J* = 5.0 Hz, 2H). 13C NMR (CDCl3, 125 MHz) δ(ppm) 124.0, 128.0, 128.3, 128.4, 128.5, 128.6, 128.7, 129.3, 129.7, 130.0, 132.6, 138.3, 139.0, 141.4, 154.6, 192.7.


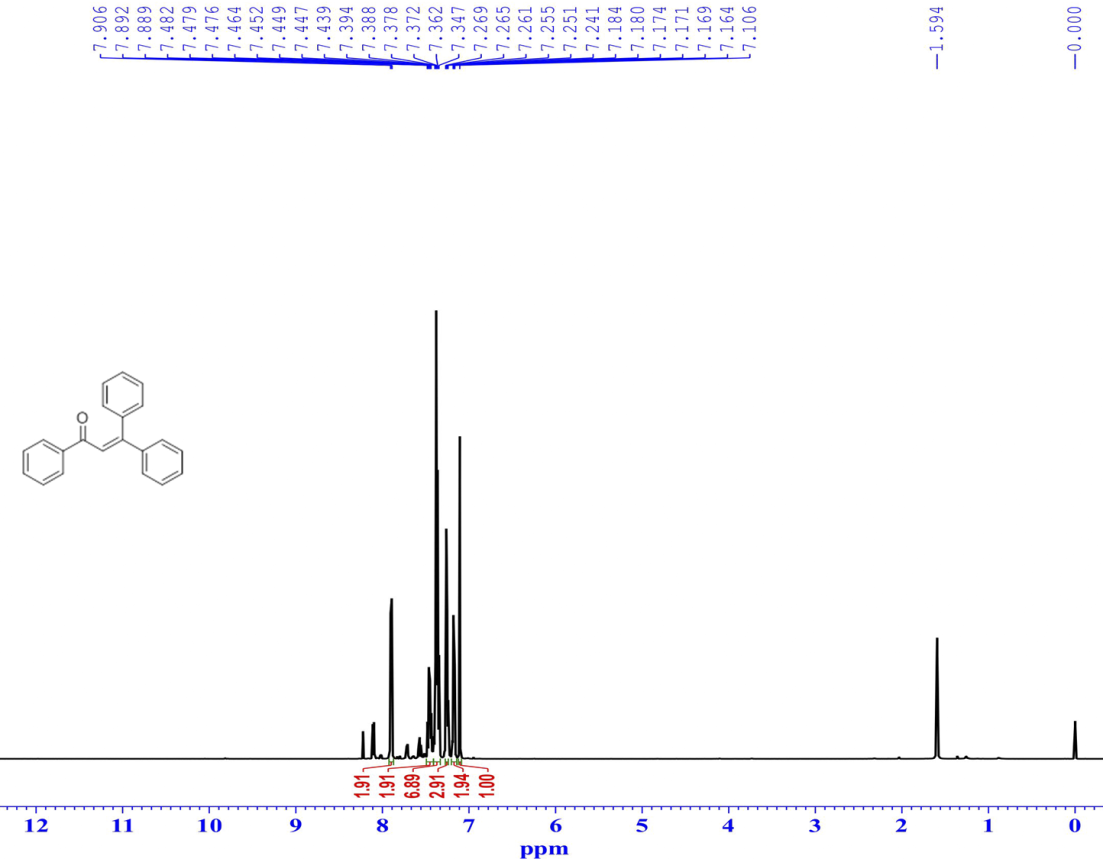


Fig.S21. 1H-NMR spectra of 1,3,3-triphenylprop-2-en-1-one.


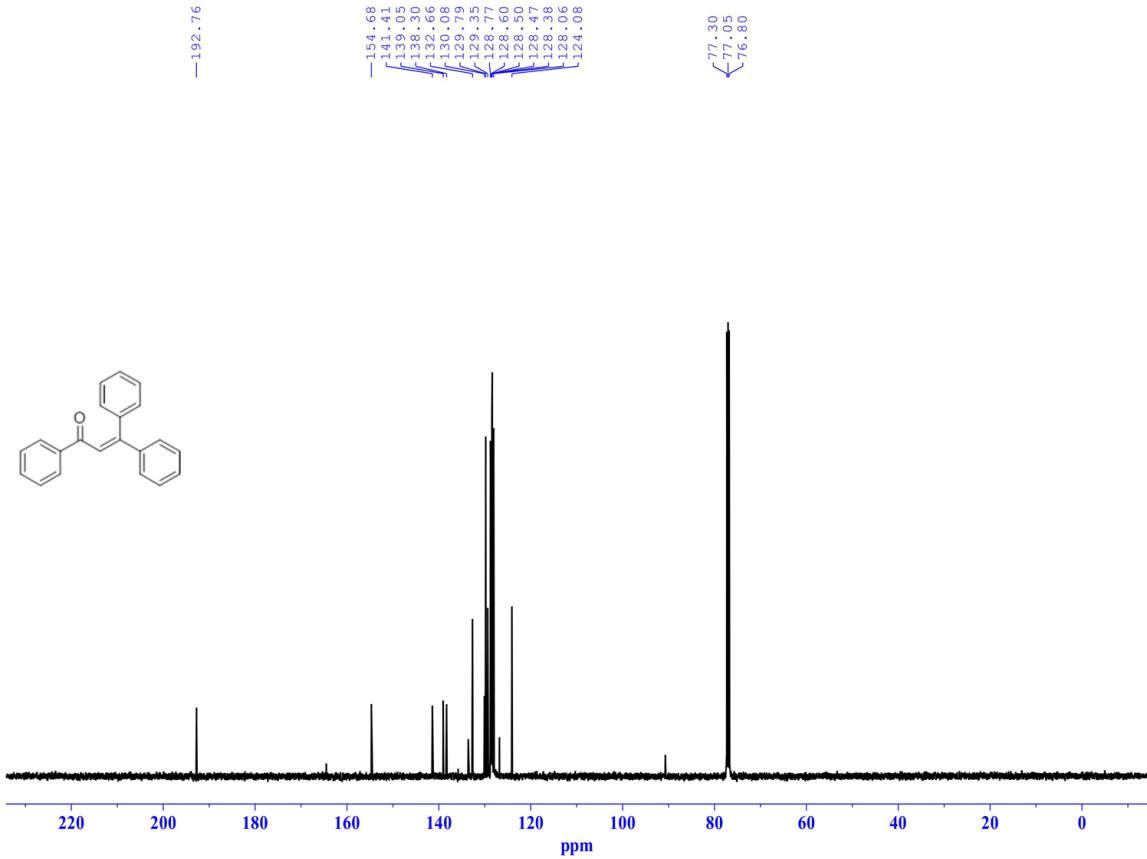


Fig.S22. 13C-NMR spectra of 1,3,3-triphenylprop-2-en-1-one.

**Characterization data for 1,3,3-triphenylprop-2-en-1-one**

Prepared as shown in the general experimental procedure and purified on silica gel (230-400 mesh or 37-63 m, ethyl acetate/hexane = 1:15 (v./v.), TLC silica gel 60 F254, Rf = 0.3): Light yellow liquid, 69% yield (59 mg). 1H-NMR (500 MHz, CDCl3) 7.10 (s, 1H), 7.16-7.18 (m, 2H), 7.24-7.26 (m, 3H), 7.34-7.39 (m, 7H), 7.43-7.48 (m, 1H), 7.89-7.90 (d, *J* = 5.0 Hz, 2H). 13C NMR (CDCl3, 125 MHz) δ(ppm) 124.0, 128.0, 128.3, 128.4, 128.5, 128.6, 128.7, 129.3, 129.7, 130.0, 132.6, 138.3, 139.0, 141.4, 154.6, 192.7.


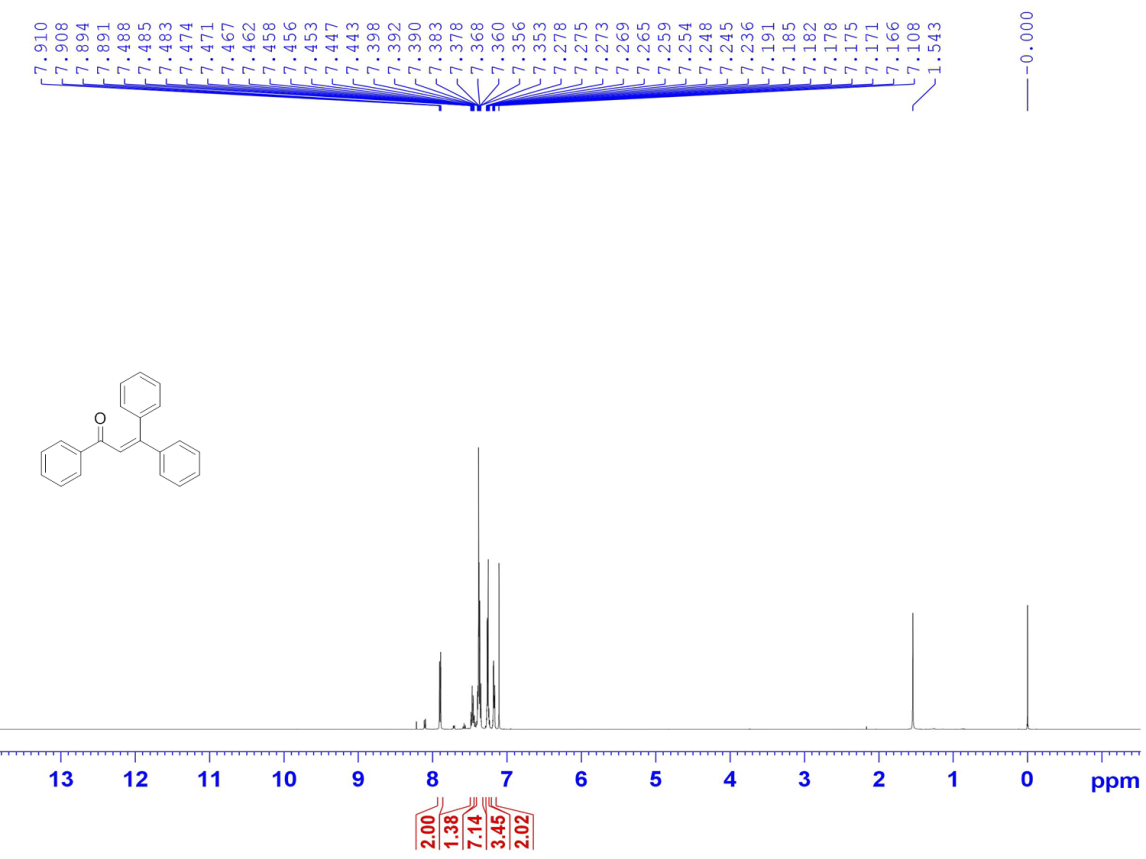


Fig.S23. 1H-NMR spectra of 1,3,3-triphenylprop-2-en-1-one.


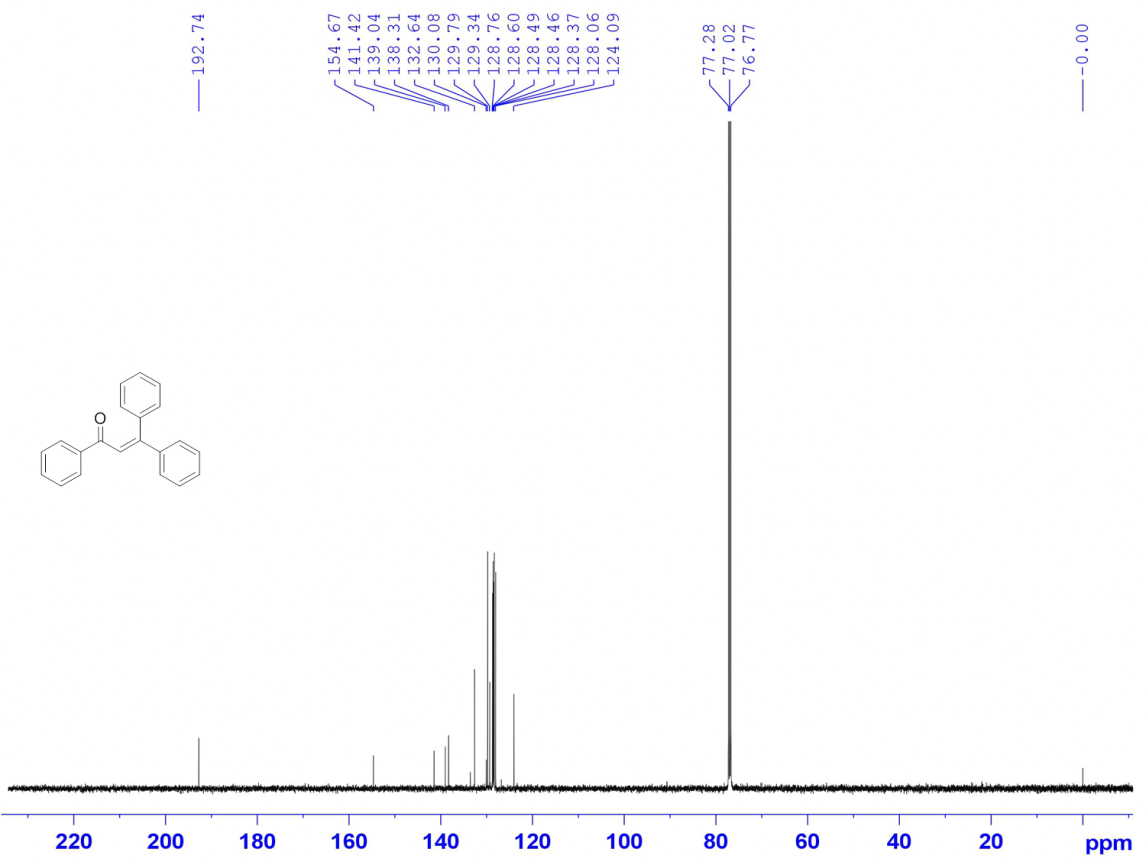


Fig.S24. 13C-NMR spectra of 1,3,3-triphenylprop-2-en-1-one.

**Characterization data for 1,3,3-triphenylprop-2-en-1-one**

Prepared as shown in the general experimental procedure and purified on silica gel (230-400 mesh or 37-63 m, ethyl acetate/hexane = 1:15 (v./v.), TLC silica gel 60 F254, Rf = 0.4): Yellow liquid, 66% yield (56 mg). 1H-NMR (500 MHz, CDCl3) 7.10 (s, 1H), 7.16-7.19 (m, 2H), 7.23-7.27 (m, 3H), 7.35-7.39 (m, 7H), 7.44-7.48 (m, 1H), 7.89 (dd, *J* = 8.0 Hz, 1.0 Hz, 2H). 13C NMR (CDCl3, 125 MHz) δ(ppm) 124.0, 128.0, 128.3, 128.4, 128.4, 128.6, 128.7, 129.3, 129.7, 130.0, 132.6, 138.3, 139.0, 141.4, 154.6, 192.7.
